# Supplementary material for: New layered cobalt oxyfluoride, Sr2CoO3F
Source: Royal Society of Chemistry journal article supplement (doi:10.1039/c0cc05482h), 2011-01-01
Supplement: c0cc05482h.pdf [file c0cc05482h.pdf]

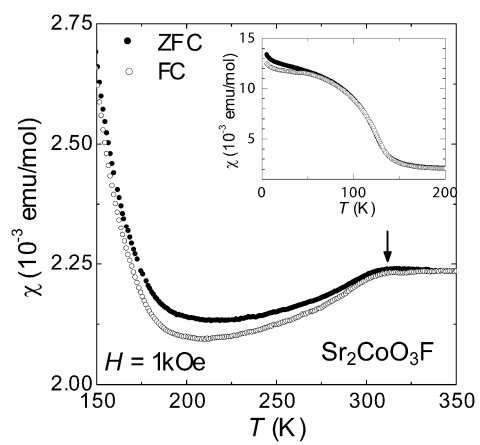

Fig. S1: Temperature dependence of the magnetic susceptibility measured in  $H = 1$  kOe under ZFC and ZF conditions. The inset shows the data in the range of  $10 \leq T \leq 200$  K.
